# Supplementary material
Source: PubMed Central journal article supplement (PMC7398503)
Supplement: NIHMS1612060-supplement-Sup_Info_1.pdf [file NIHMS1612060-supplement-Sup_Info_1.pdf]

# Figure S1

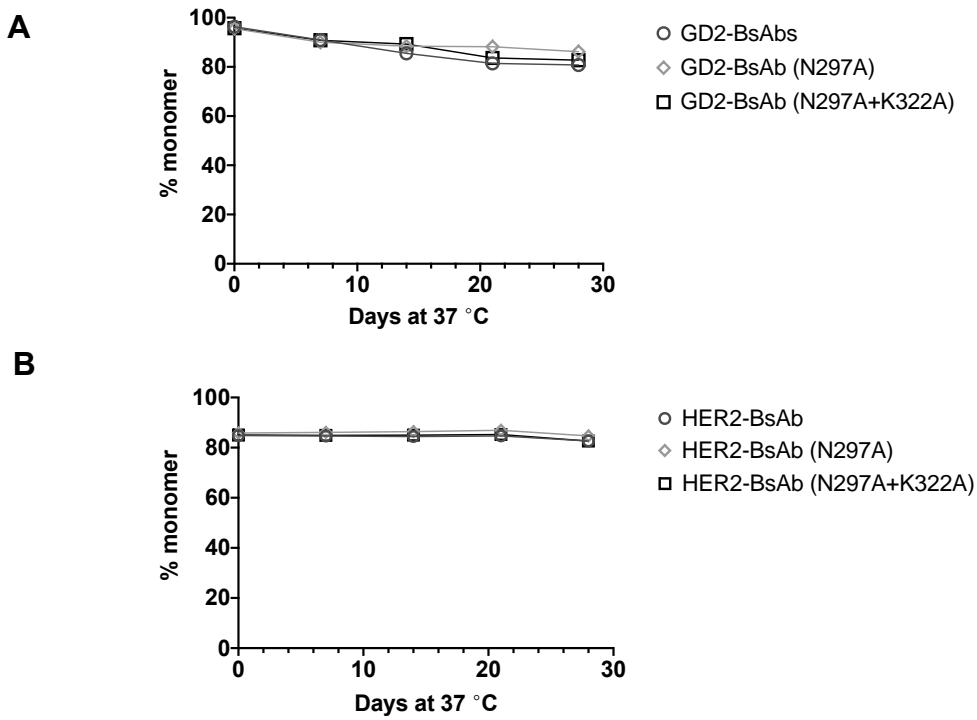

**Supplementary Figure S1.** Comparisons of BsAb purities and their stabilities at 37 °C over four weeks. A, GD2-BsAb and its Fc mutants. B, HER2-BsAb and its Fc mutants.

## Figure S2

**A**

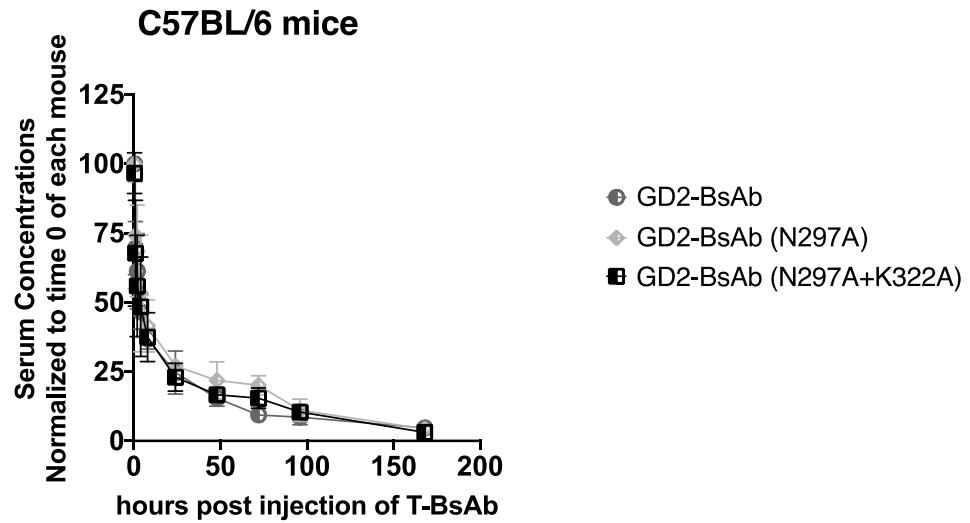

**B**

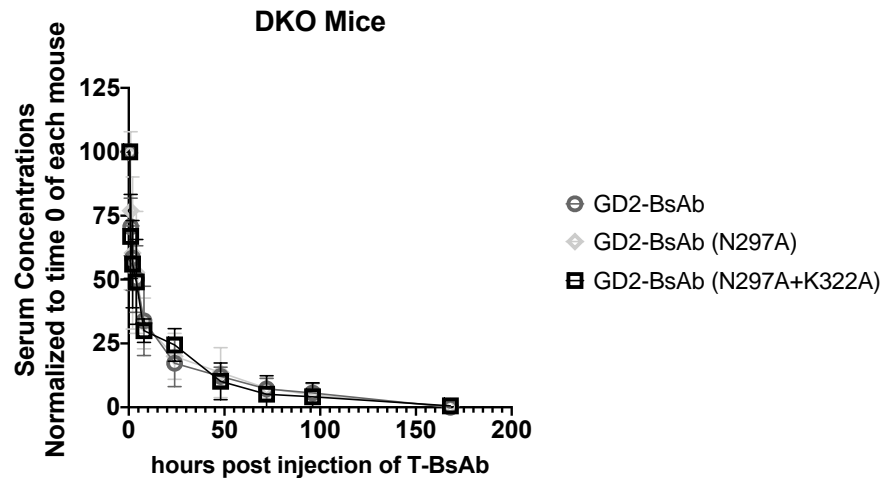

**C**

|                        | $t_{1/2}$ (days) |           |
|------------------------|------------------|-----------|
|                        | C57BL/6          | DKO       |
| GD2-BsAb               | 2.19±0.51        | 2.40±0.36 |
| GD2-BsAb (N297A)       | 2.04±0.52        | 2.82±0.42 |
| GD2-BsAb (N297A+K322A) | 1.93±0.21        | 2.32±0.39 |

**Supplementary Figure S2.** **A**, Serum concentration (normalized to time zero for each individual mouse) of GD2-BsAb and Fc variants in C57BL/6 mice following one IV injection of 100  $\mu$ g BsAb, n=5. **B**, Serum concentration (normalized to time zero for each individual mouse) of GD2-BsAb and Fc variants in DKO mice following one IV injection of 100  $\mu$ g BsAb, n=5. **C**, Terminal half-lives of GD2-BsAb and its Fc mutants.

## Figure S3

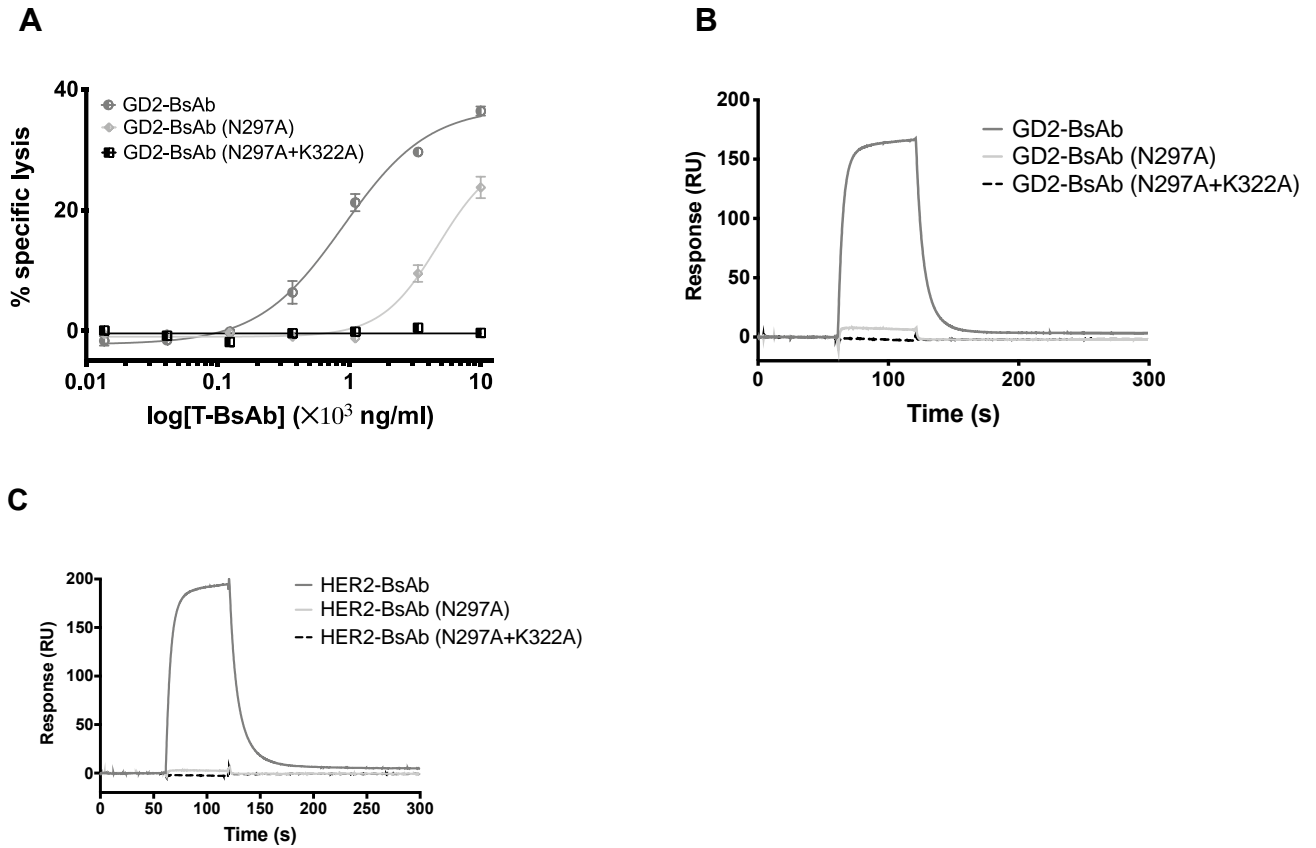

**Supplementary Figure S3. A**, Comparison of complement-dependent cytotoxicities between GD2-BsAb and its Fc mutants against GD2(+) IMR-32 cells. Exogenous complement source was human serum diluted at 1:80. **B**, Binding kinetics (by SPR) of GD2-BsAb and its two mutants (25 nM) on human C1q and **C**, Binding kinetics (by SPR) of HER2-BsAb and its two mutants (25 nM) on human C1q.

## Figure S4

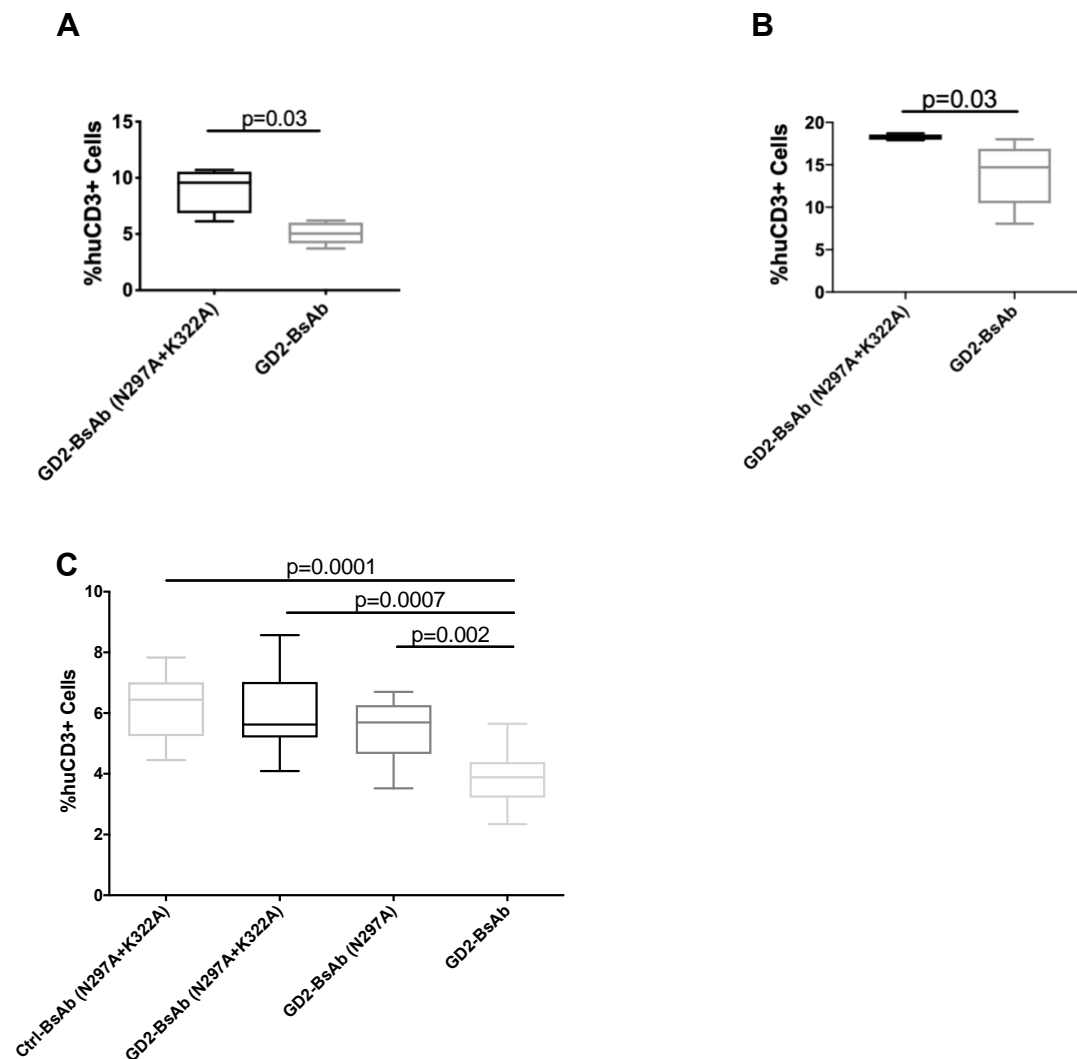

**Supplementary Figure S4. A**, Comparison of T cell counts in blood 24 hours after one dose of GD2-specific BsAbs in huCD3ε transgenic tumor-free mice, measured by flow cytometry (n=5 each group). **B**, Comparison of T cell counts in spleen 72 hours after one dose of GD2-specific BsAbs in huCD3ε transgenic tumor-free mice, measured by flow cytometry (n=5 each group). **C**, Comparison of T cell counts in blood after four doses of GD2-specific BsAbs in huCD3ε transgenic tumor (EL4)-bearing mice, measured by flow cytometry (n=10 each group).

**Figure S5**

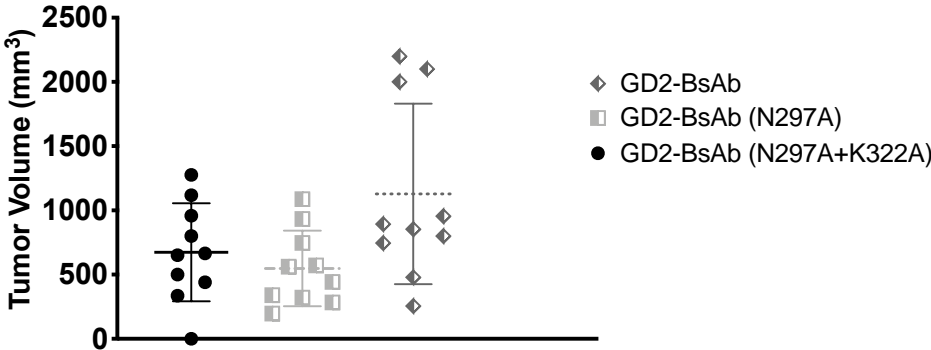

**Supplementary Figure S5.** Individual EL4 tumor volumes in huCD3ε-tg mice following treatment with different BsAbs on day 31 post treatment (n=10 per group).

## Figure S6

A

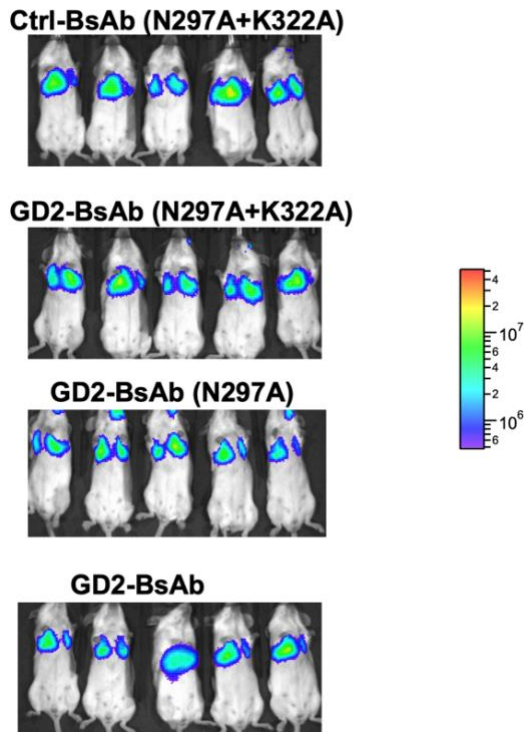

B

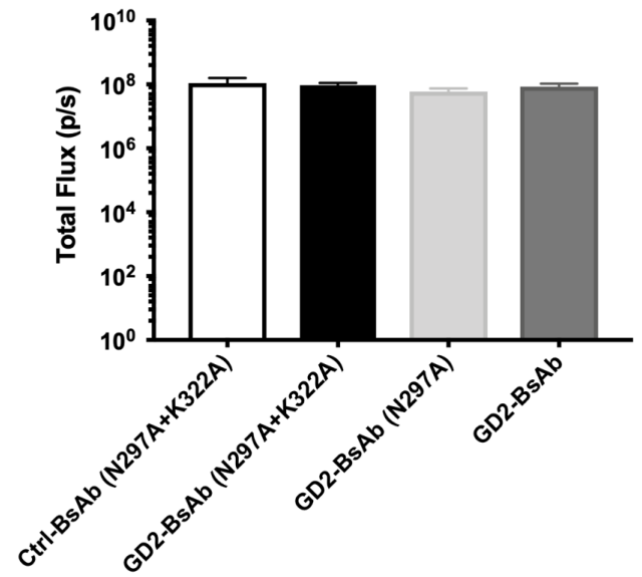

**Supplementary Figure S6.** A, T cell trafficking to mouse lungs imaged by bioluminescence 30 minutes after T cell injection: comparison between Ctrl-BsAb and GD2-binding BsAbs. B, Quantitation of T cell trafficking to mouse lungs measured by bioluminescence (total flux) expressed as photons per second (n=5 per group).

## Figure S7

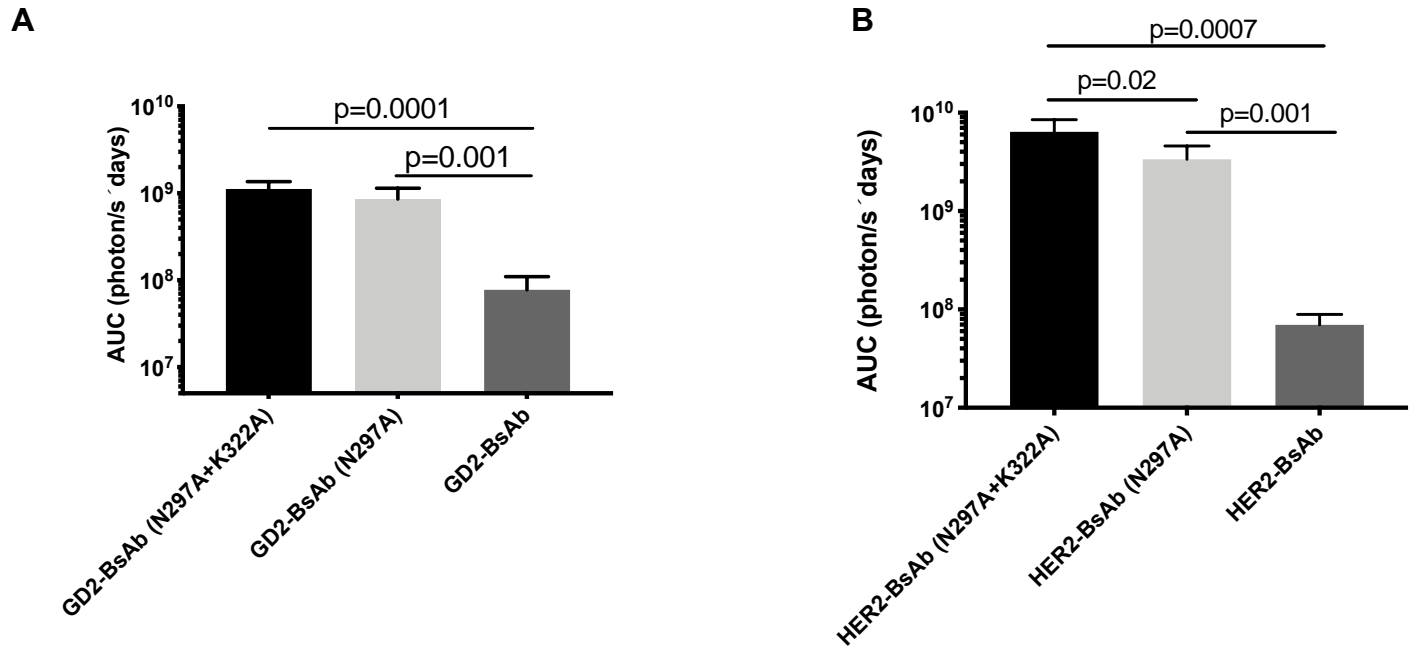

**Supplementary Figure S7.** **A**, AUC analysis of T cell trafficking into tumors measured by bioluminescence in mice treated with Ctrl-BsAb and GD2-binding BsAbs in Fig. 4B. **B**, AUC analysis of T cell trafficking into tumors measured by bioluminescence in mice treated with Ctrl-BsAb and HER2 series of BsAbs in Fig 5B.

## Figure S8

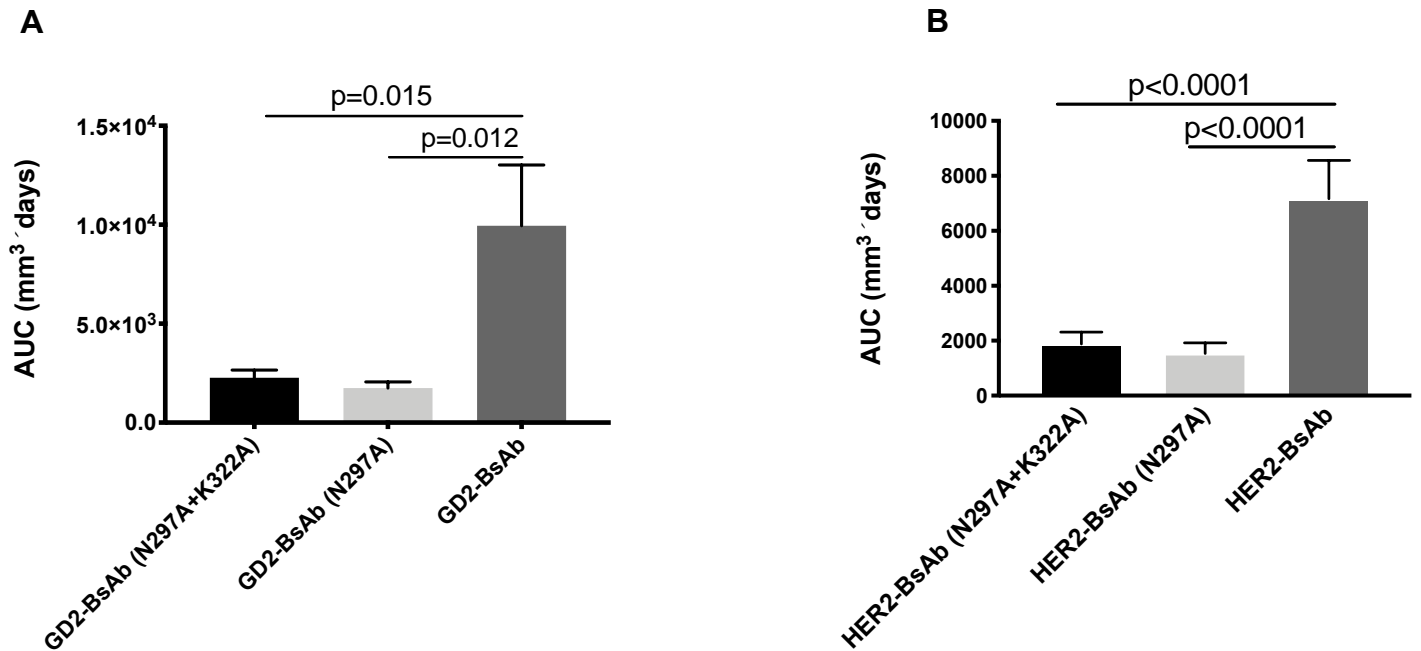

**Supplementary Figure S8.** **A**, AUC analysis of tumor growth in mice treated with Ctrl-BsAb and GD2-binding BsAbs in Fig. 4D. **B**, AUC analysis of tumor growth in mice treated with Ctrl-BsAb and HER2 series of BsAbs in Fig 5D.



## Figure S9

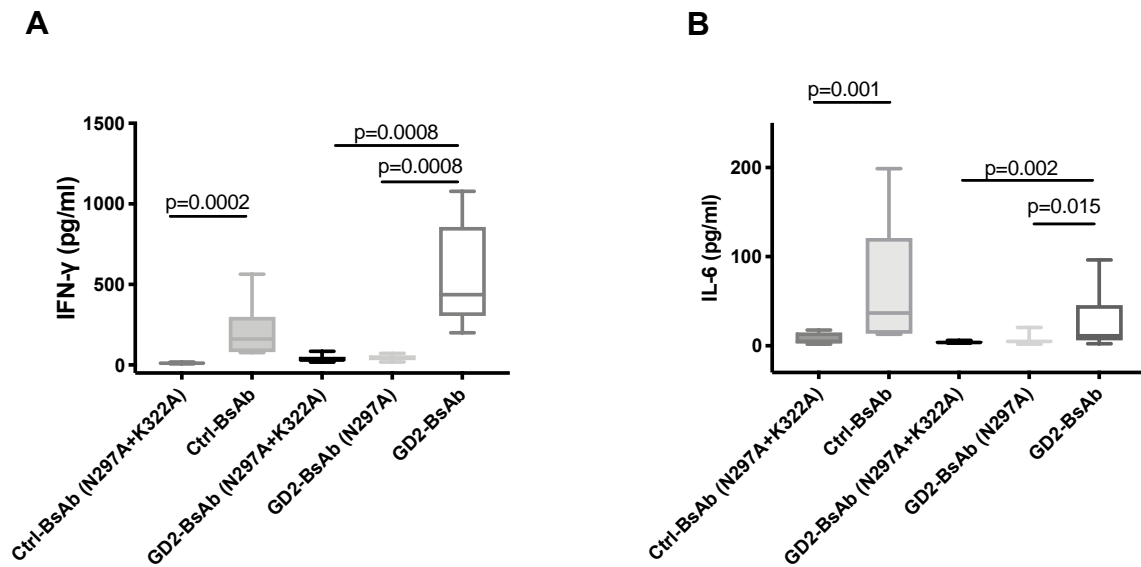

**Supplementary Figure S9.** Serum cytokine levels in immunodeficient mice 24 hours after T cell injection. **A**, human IFN- $\gamma$ . **B**, mouse IL-6 (n=5 per group).

**Figure S10**

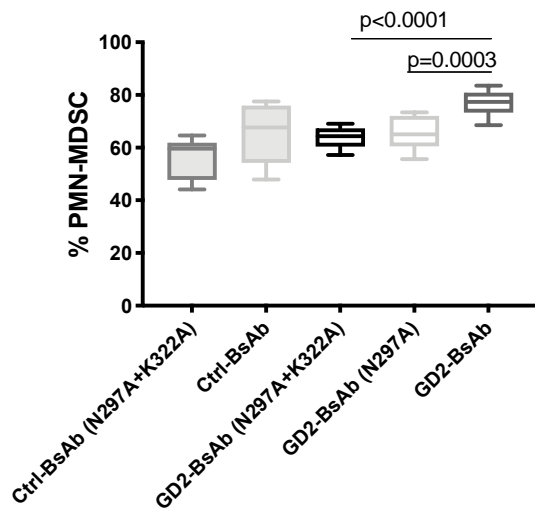

**Supplementary Figure S10.** Comparison of PMN-MDSC counts in blood 24 hours after ATC injection in DKO mice (n = 10), comparing treatments with Ctrl-BsAb with and without Fc mutations versus GD2-BsAb with and without Fc mutations.

# Figure S11

**A**

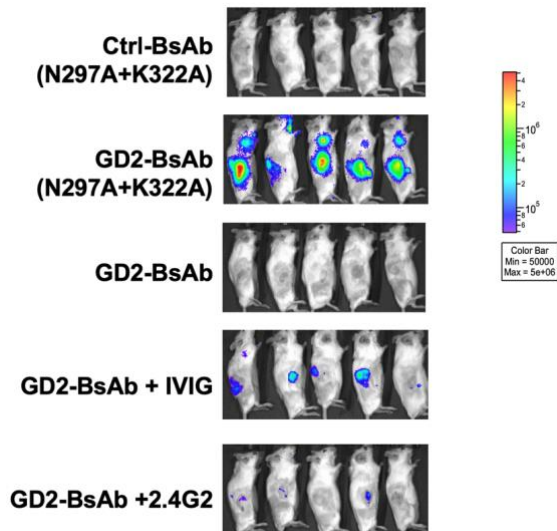

**B**

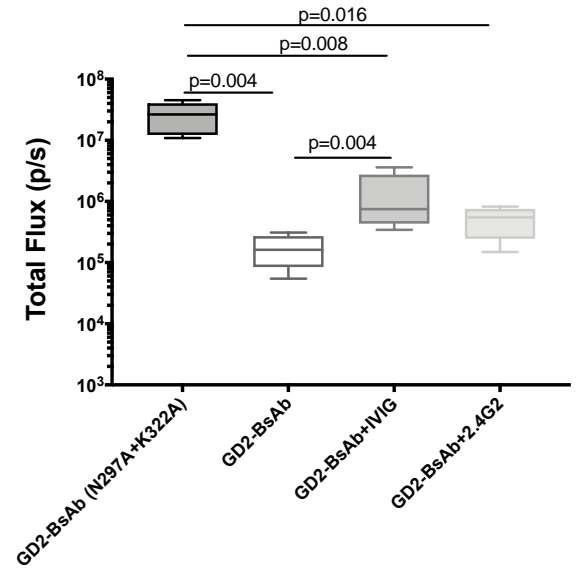

**Supplementary Figure S11.** Effects of Fc $\gamma$ R blocking by IVIG and 2.4G2 on T cell trafficking into tumors. **A**, T cell trafficking imaged by bioluminescence on Day 5 post T cell injection. **B**, Quantitation of T cell trafficking into tumor sites measured by bioluminescence on Day 5 post T cell injection. N = 5 per group.

# Figure S12

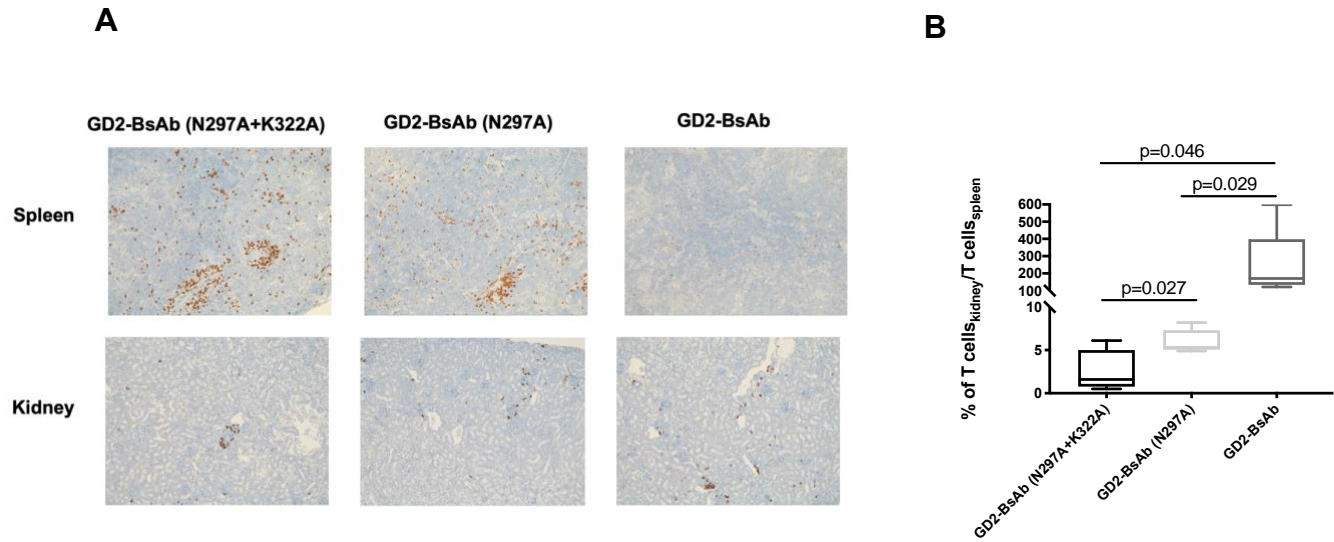

**Supplementary Figure S12.** Effects of complement-activating BsAb on T cell infiltration into kidneys **A**, Representative immunohistochemistry images of huCD45(+) T cells in spleen and kidney sections 72 hours after T cell injection (100X magnifications). **B**, Ratio of T cell numbers in kidney to spleen enumerated by IHC (n = 5 per group).
